# Supplementary material for: Bacterial Microbiome Dynamics in Post Pull-Through Hirschsprung-Associated Enterocolitis (HAEC): An Experimental Study Employing the Endothelin Receptor B-Null Mouse Model
Source: Front Surg. 2018 Apr 6;5:30. doi: 10.3389/fsurg.2018.00030 (PMC5897423; doi:10.3389/fsurg.2018.00030)
Supplement: Table S1 — Adonis Tests of Hellinger Beta Diversity Values from Fecal Bacterial Sequences at Several Times in Relation to Pull-Through Surgery from WT and Ednrb−/− Mice with and without HAEC. [file Table1.XLSX]

## Sheet: Resorted
Supplementary Table S1. Adonis Tests of Hellinger Beta Diversity Values from Fecal Bacterial Sequences at Several Times in Relation to Pull-Through Surgery from WT and Ednrb-/- Mice with and without HAEC
A. WT and Ednrb-/- Mice
	WT	Ednrb-/-
WT		0.001
Ednrb-/-
Values in cells are probabilities.
n = 22 and 24 for Ednrb-/- and WT mice, respectively.
B. WT and Ednrb-/- Mice with and without HAEC at Several Times in Relation to Pull-Through Surgery
	WT 0	WT 2	WT 4	HAEC 0	HAEC 2	NO HAEC 0	NO HAEC 2	NO HAEC 4
WT 0		0.034	0.005	ns	0.001	0.032	0.011	0.023
WT 2				ns	0.007	ns	0.039	ns
WT 4				0.047	0.003	0.039	0.01	ns
HAEC 0					ns	ns	ns	ns
HAEC 2						ns	ns	ns
NO HAEC 0							ns	ns
NO HAEC 2								ns
NO HAEC 4
Values in cells are probabilities.
ns = probability values > 0.05.
n = 8 (WT 0, 2, 4), 6 (HAEC 0, 2), 4 (NO HAEC 0, 2), 2 (NO HAEC 4).
